# Supplementary figures and images for: Clarinet (CLA-1), a novel active zone protein required for synaptic vesicle clustering and release
Source: eLife journal article supplement (doi:10.7554/elife.29276), 2017-11-21

Figure 1-supplement 1

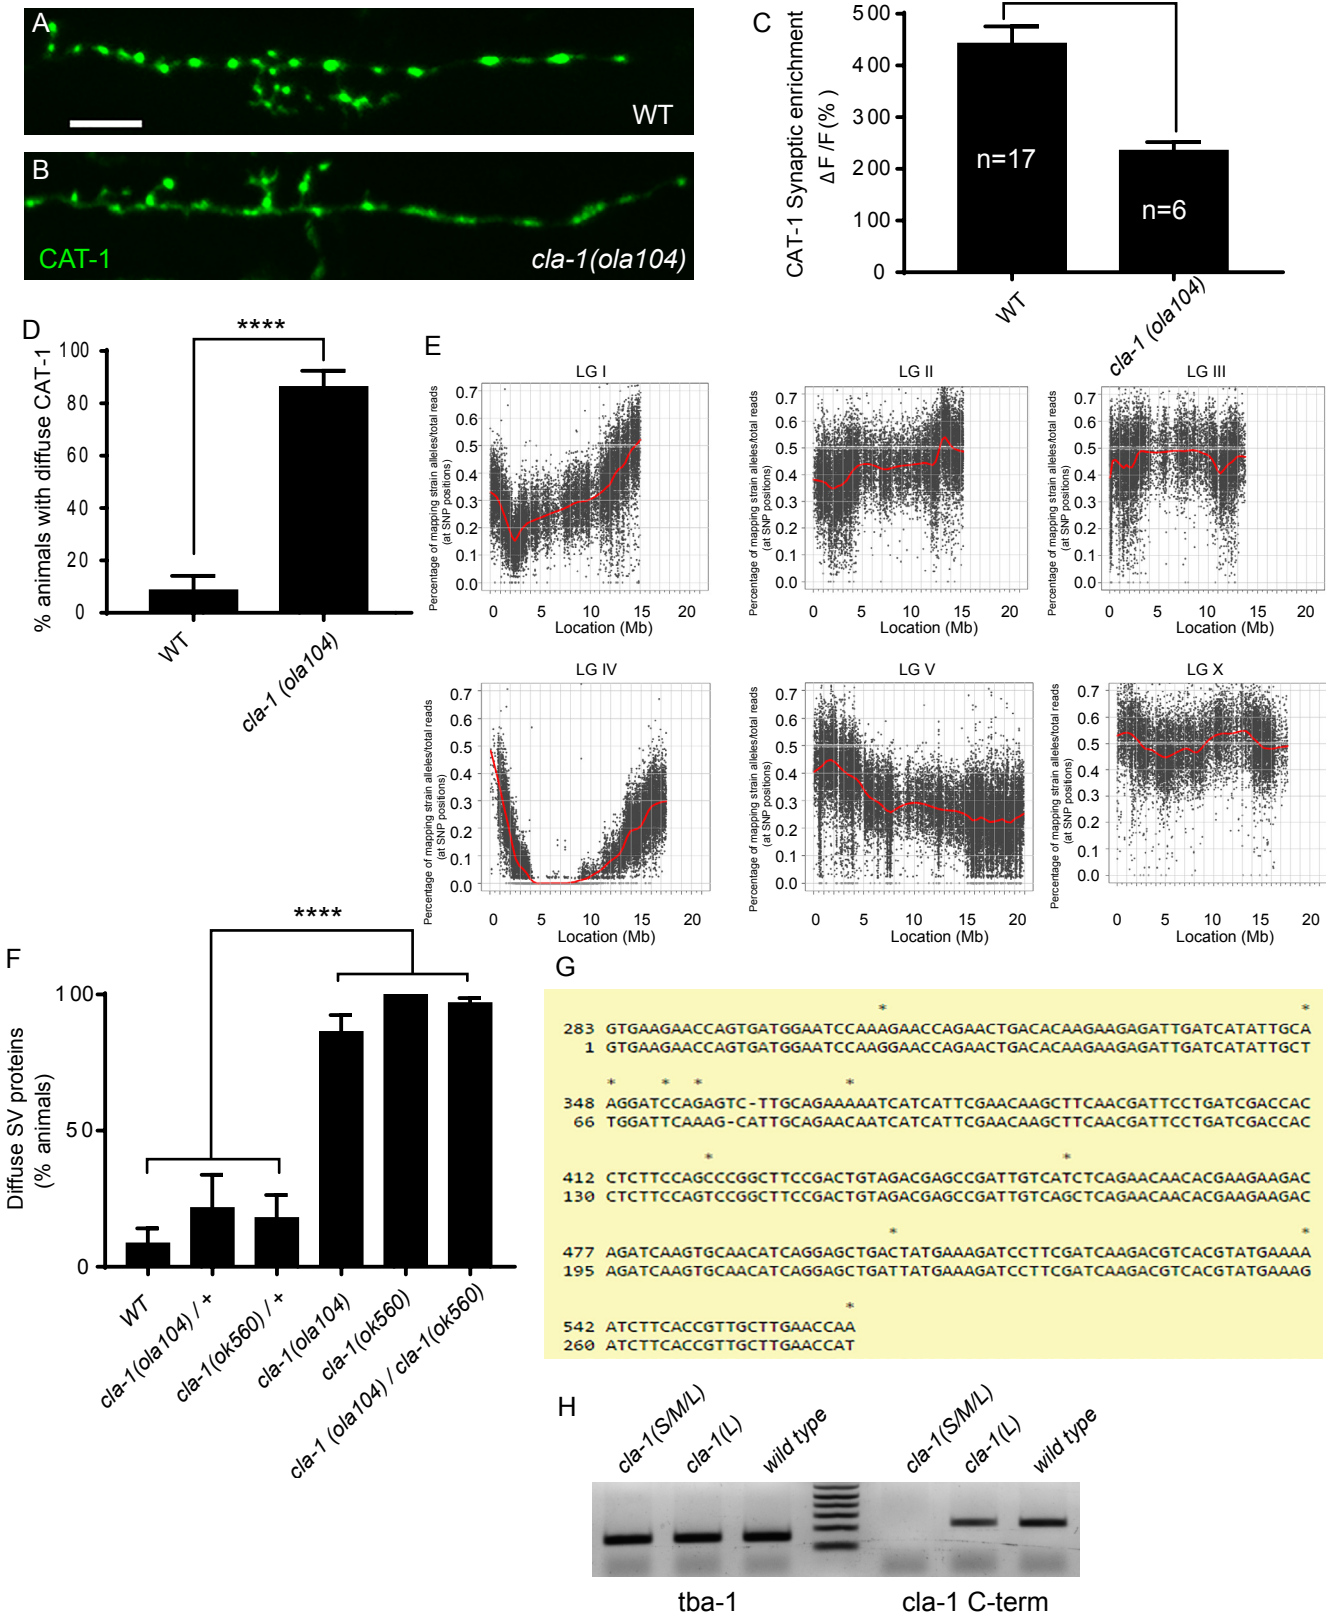

Supplement: supp [file elife_poa_e29276_Figure_1_figure_supplement_1.pdf › elife_poa_e29276_Figure_1_figure_supplement_1.pdf]

Figure 1-supplement 2

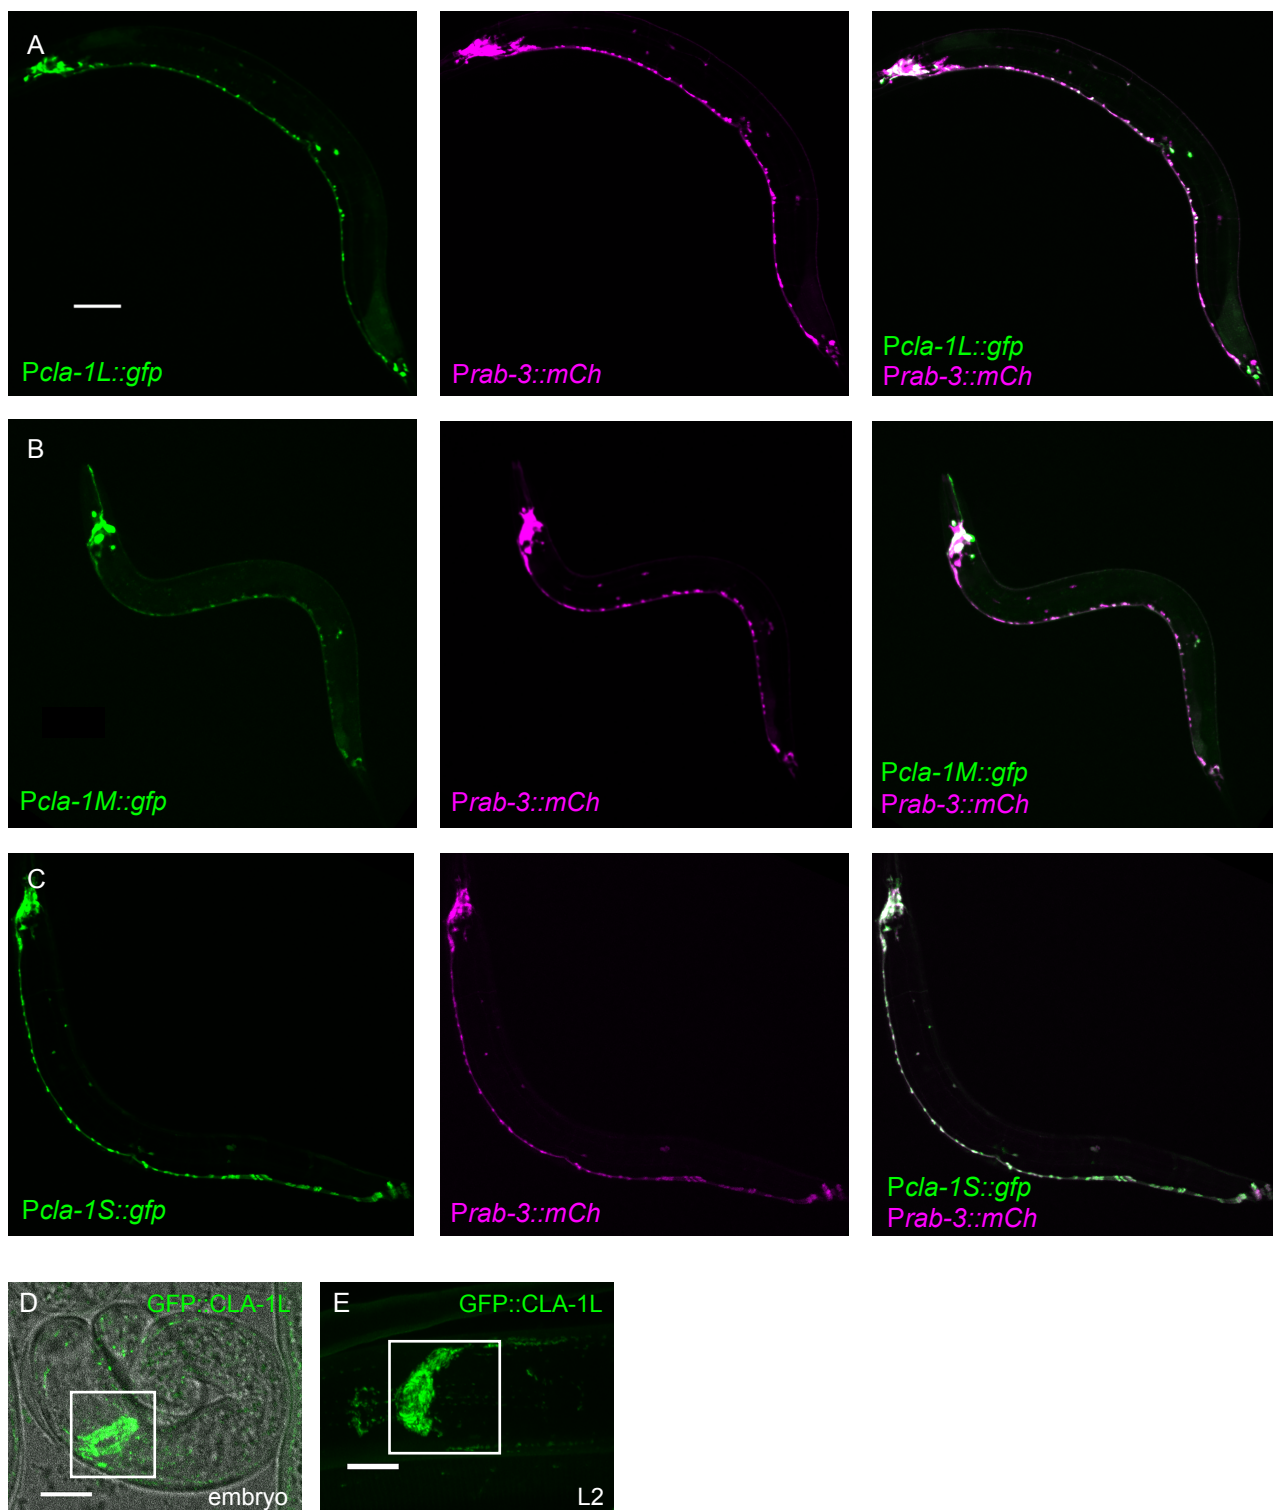

Supplement: supp [file elife_poa_e29276_Figure_1_figure_supplement_2.pdf › elife_poa_e29276_Figure_1_figure_supplement_2.pdf]

A

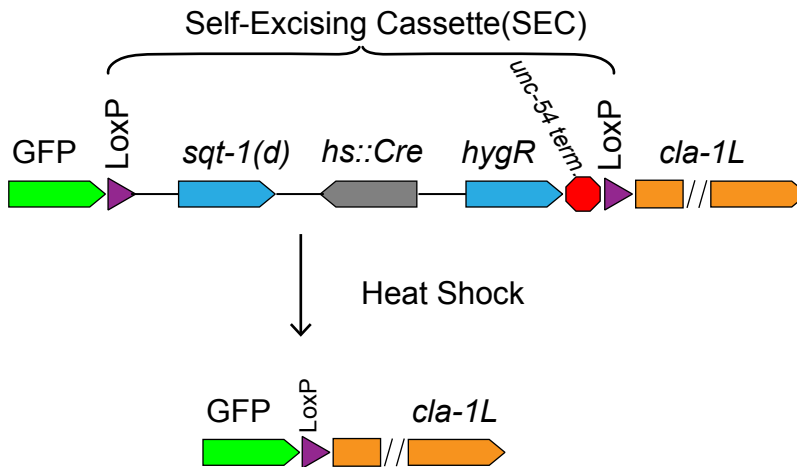

B

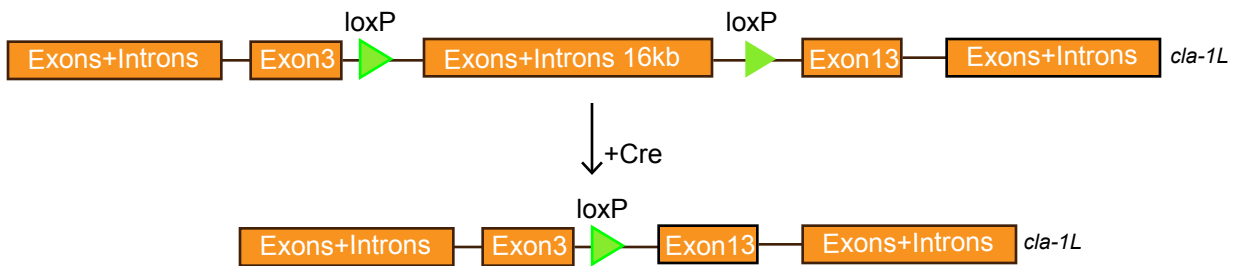

C

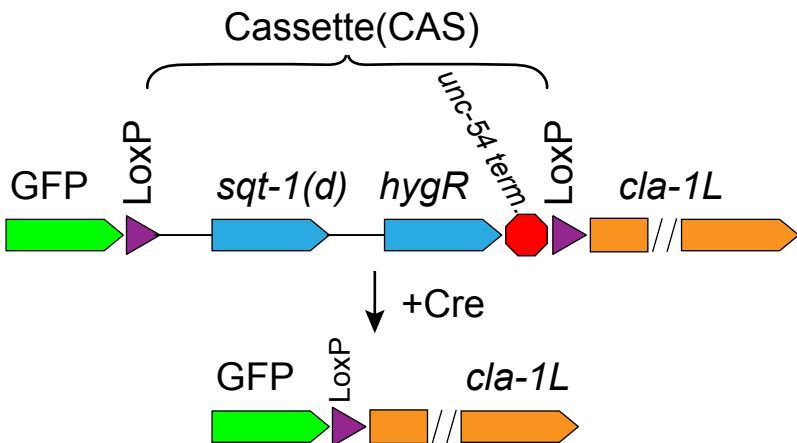

Supplement: supp [file elife_poa_e29276_Figure_2_figure_supplement_1.pdf › elife_poa_e29276_Figure_2_figure_supplement_1.pdf]

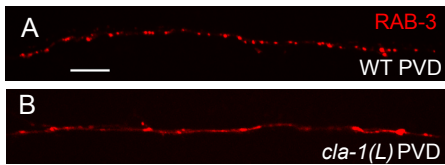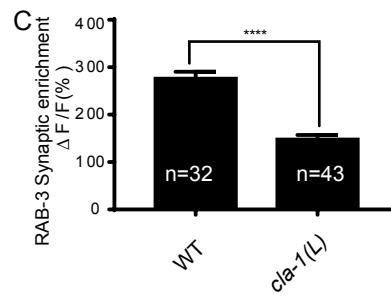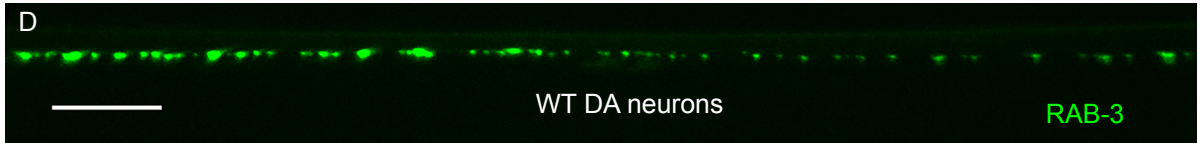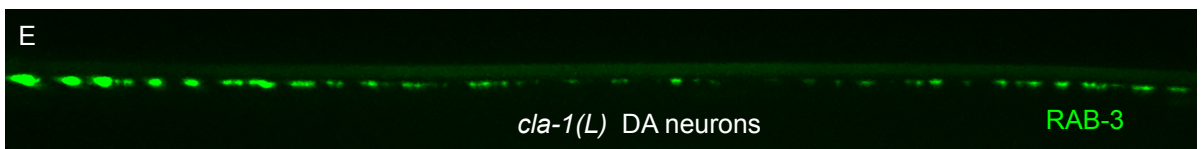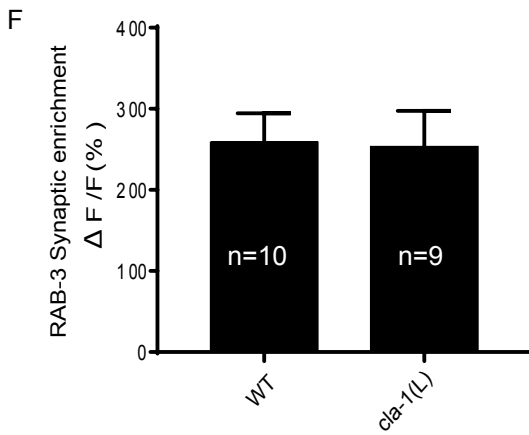

Supplement: supp [file elife_poa_e29276_Figure_3_figure_supplement_1.pdf › elife_poa_e29276_Figure_3_figure_supplement_1.pdf]

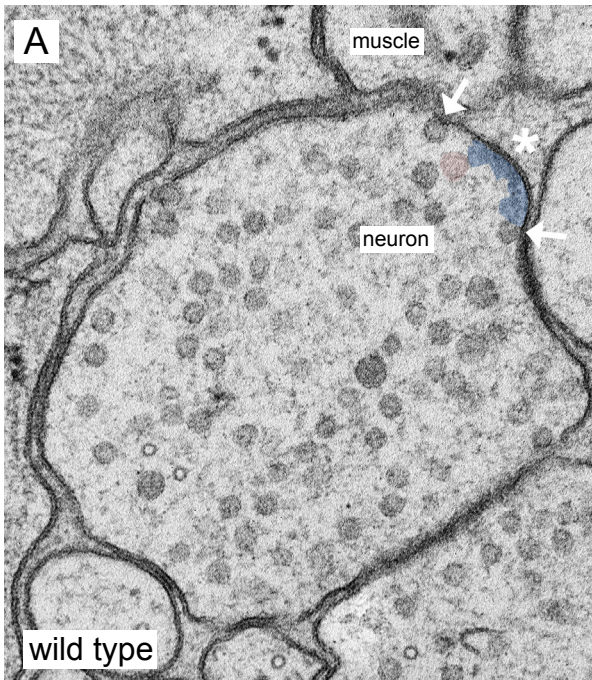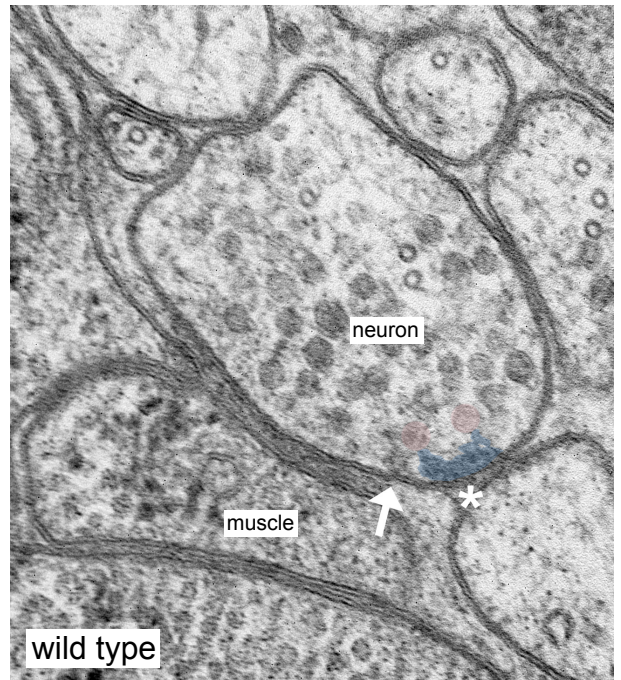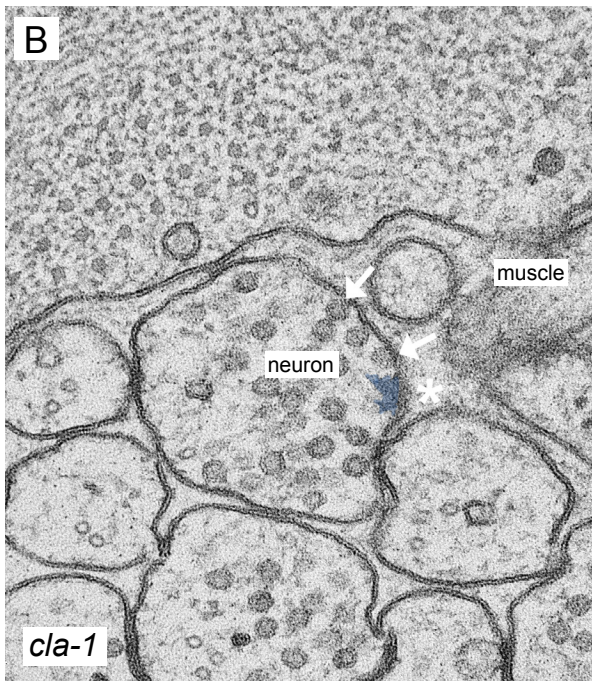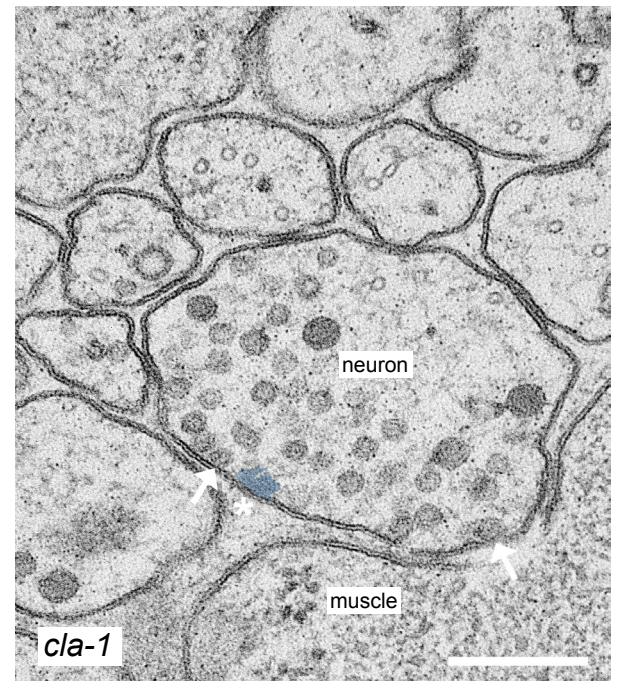

Supplement: supp [file elife_poa_e29276_Figure_5_figure_supplement_1.pdf › elife_poa_e29276_Figure_5_figure_supplement_1.pdf]

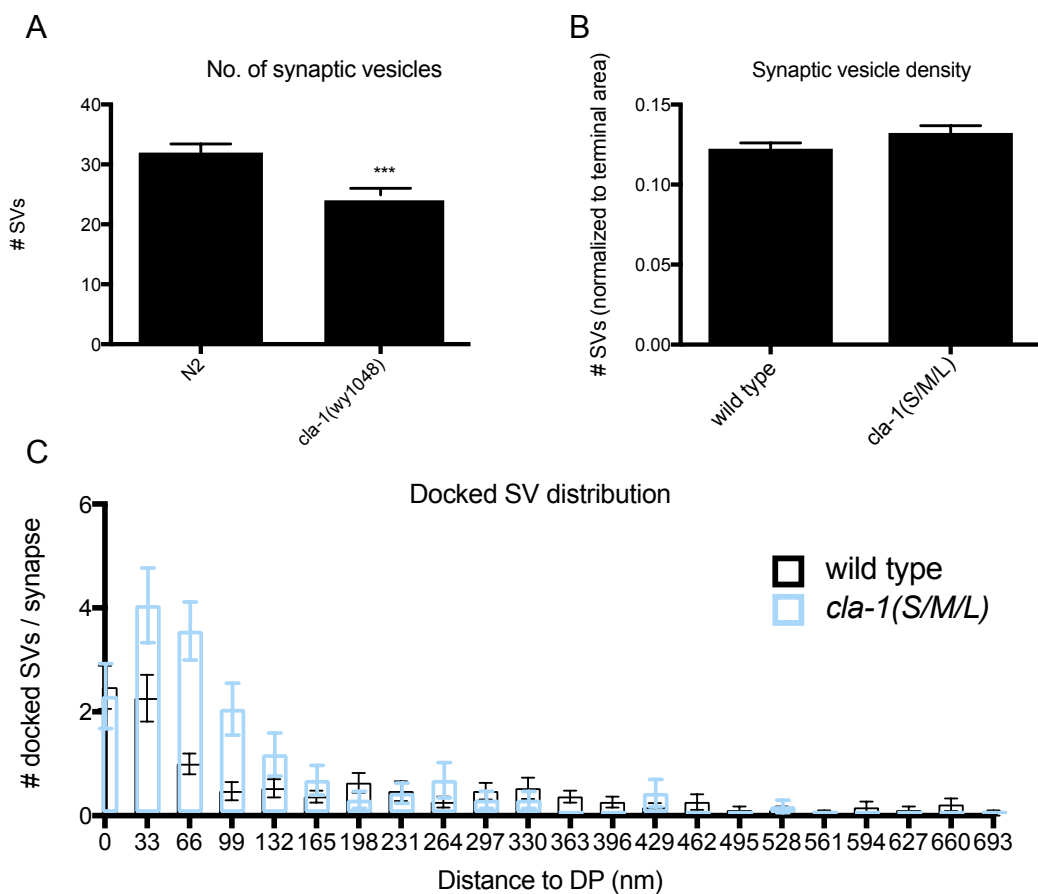

Supplement: supp [file elife_poa_e29276_Figure_5_figure_supplement_2.pdf › elife_poa_e29276_Figure_5_figure_supplement_2.pdf]

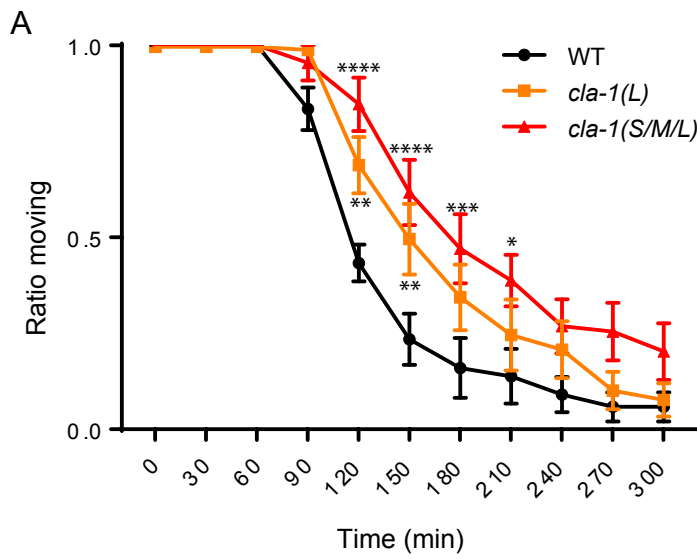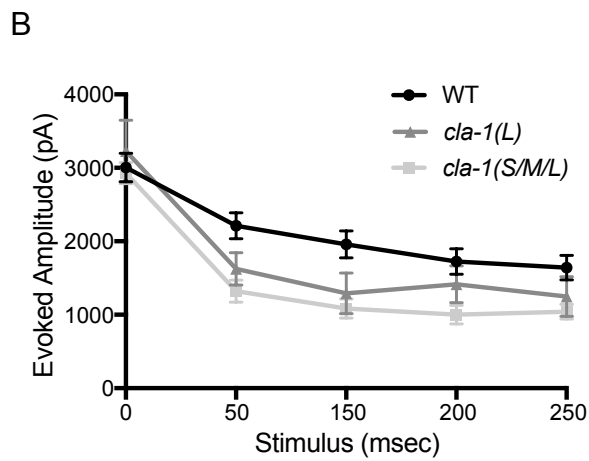

Supplement: supp [file elife_poa_e29276_Figure_6_figure_supplement_1.pdf › elife_poa_e29276_Figure_6_figure_supplement_1.pdf]

Figure 7-supplement 1

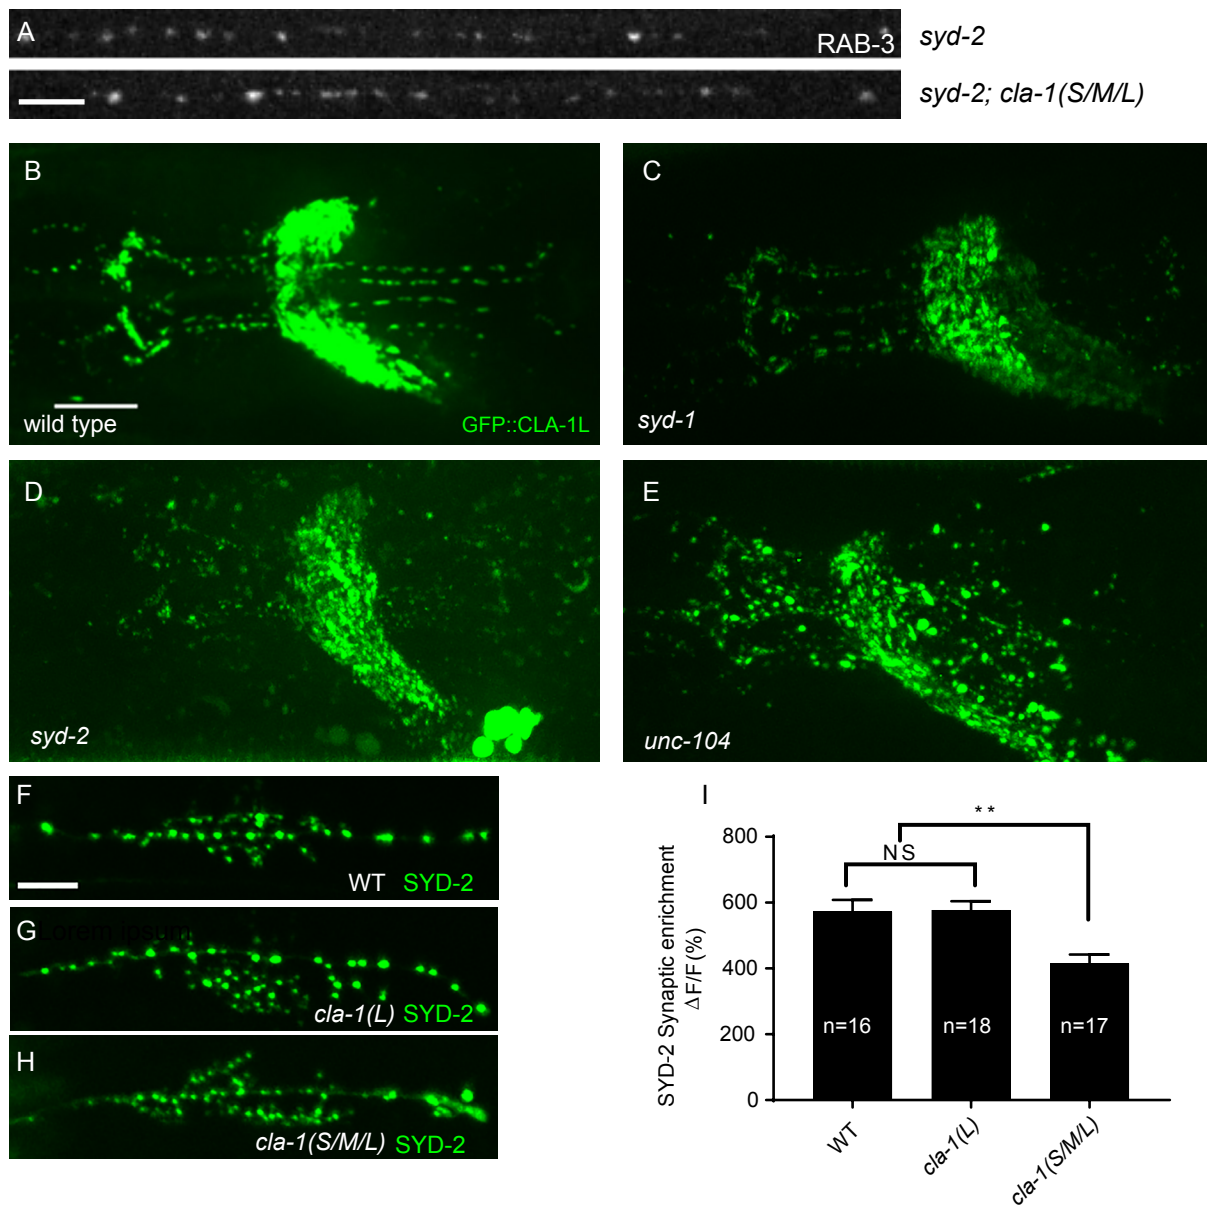

Supplement: supp [file elife_poa_e29276_Figure_7_figure_supplement_1.pdf › elife_poa_e29276_Figure_7_figure_supplement_1.pdf]
